# Supplementary material for: Scans for signatures of selection in Russian cattle breed genomes reveal new candidate genes for environmental adaptation and acclimation
Source: PubMed Central journal article supplement (PMC6113280; doi:10.1038/s41598-018-31304-w), 2018-08-28
Supplement: 41598_2018_31304_MOESM1_ESM.pdf [file 41598_2018_31304_MOESM1_ESM.pdf]

## Scans for signatures of selection in Russian cattle breed genomes reveal new candidate genes for environmental adaptation and acclimation

Andrey A. Yurchenko, Hans D. Daetwyler, Nikolay Yudin, Robert D. Schnabel, Christy J. Vander Jagt, Vladimir Soloshenko, Bulat Lhasaranov, Ruslan Popov, Jeremey F. Taylor, Denis M. Larkin

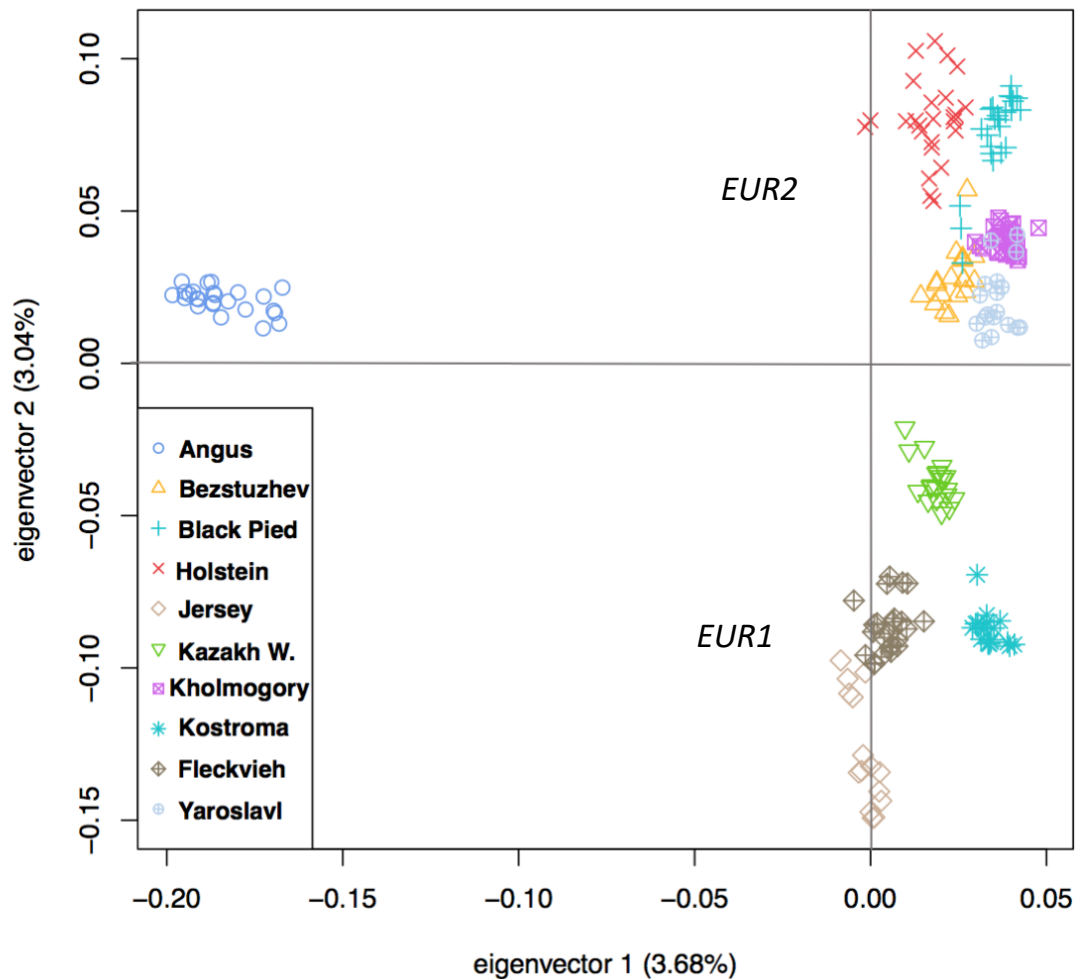

**Supplementary Figure S1.** Principal component analysis of genotypes from native Russian breeds and additional cattle breeds of European origins. Two clusters of European breeds used in hapFLK analyses are indicated by ovals and named EUR1 and EUR2.

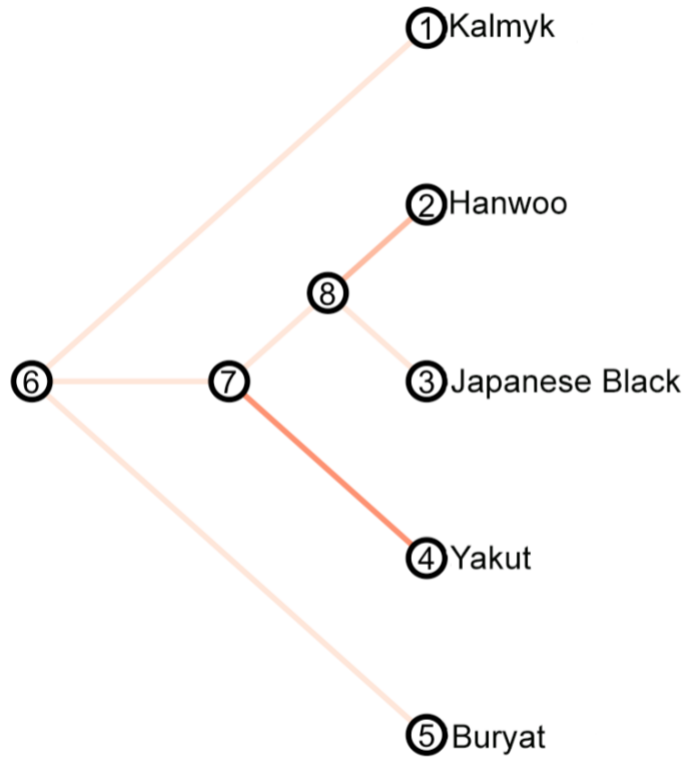

**Supplementary Figure S2.** Haplotypes local tree for the interval on chr20:52.30-57.56 Mbp showing a significant signature of selection on the Yakut cattle branch (p-value = 0.001) and a suggestive signature on the Hanwoo branch (p-value = 0.09).

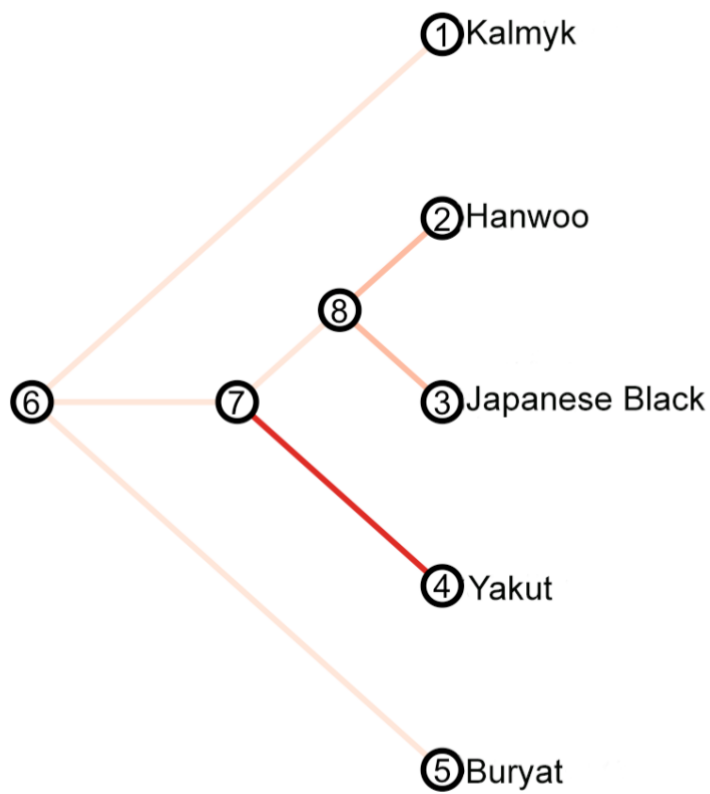

**Supplementary Figure S3.** Haplotypes local tree for the interval on chr4:14.19-15.45 Mbp showing a significant signature of selection on the Yakut cattle branch (p-value = 0.00005) and suggestive signatures on the Hanwoo and Japanese Black branches (p-values = 0.05).

**Supplementary Table S1.** Regions predicted to be under putative selection and genes in these regions in Russian and additional cattle breeds of European and Asian origins (in a separate Excel file).

**Supplementary Table S2.** Regions under putative selection detected by hapFLK analysis in Asian cattle breeds and breeds possessing selective signatures according to haplotype local tree analysis (p-value <0.05).

| <b>Chr</b> | <b>Start</b> | <b>End</b>  | <b>Size (bp)</b> | <b>Method</b> | <b>Selected in breeds</b>             |
|------------|--------------|-------------|------------------|---------------|---------------------------------------|
| 3          | 36,134,005   | 37,327,971  | 1,193,967        | hapFLK        | Japanese Black                        |
| 4          | 14,187,799   | 15,447,776  | 1,259,978        | hapFLK        | Yakut                                 |
| 4          | 101,346,553  | 102,230,528 | 883,976          | hapFLK        | Yakut, Japanese Black                 |
| 5          | 21,965,045   | 23,568,941  | 1,603,897        | hapFLK        | Hanwoo, Japanese Black                |
| 5          | 47,752,157   | 48,286,719  | 534,563          | hapFLK        | Hanwoo, Japanese Black                |
| 5          | 70,124,916   | 70,767,676  | 642,761          | hapFLK        | Hanwoo                                |
| 6          | 1,054,786    | 1,950,128   | 895,343          | hapFLK        | Yakut, Japanese Black                 |
| 6          | 16,844,998   | 17,328,796  | 483,799          | hapFLK        | Yakut, Hanwoo                         |
| 6          | 87,916,172   | 88,421,804  | 505,633          | hapFLK        | Yakut, Hanwoo, Japanese Black, Buryat |
| 15         | 2,556,267    | 4,679,251   | 2,122,985        | hapFLK        | Japanese Black                        |
| 20         | 52,303,230   | 57,558,340  | 5,255,111        | hapFLK        | Yakut                                 |
| 26         | 23,339,772   | 24,918,578  | 1,578,807        | hapFLK        | Yakut, Japanese Black                 |
